# Supplementary material
Source: PubMed Central journal article supplement (PMC8049959)
Supplement: NIHMS1643970-supplement-Supplementary_Material.pdf [file NIHMS1643970-supplement-Supplementary_Material.pdf]

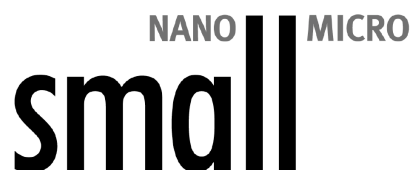

## Supporting Information

for *Small*, DOI: 10.1002/smll.202004258

A Heart-Breast Cancer-on-a-Chip Platform for Disease Modeling and Monitoring of Cardiotoxicity Induced by Cancer Chemotherapy

*Junmin Lee, Shreya Mehrotra, Elaheh Zare-Eelanjegh, Raquel O. Rodrigues, Alireza Akbarinejad, David Ge, Luca Amato, Kiavash Kiaee, YongCong Fang, Aliza Rosenkranz, Wendy Keung, Biman B. Mandal, Ronald A. Li, Ting Zhang, HeaYeon Lee, Mehmet Remzi Dokmeci, Yu Shrike Zhang, Ali Khademhosseini,\* and Su Ryon Shin\**

## Supplementary Information

**A Heart-Breast Cancer-on-a-Chip Platform for Disease Modeling and Monitoring of Cardiotoxicity Induced by Cancer Chemotherapy**

*Junmin Lee<sup>+</sup>, Shreya Mehrotra<sup>+</sup>, Elaheh Zare-Eelanjegh<sup>+</sup>, Raquel Rodrigues, Alireza Akbarinejad, David Ge, Luca Amato, Kiavash Kiaee, YongCong Fang, Aliza Rosenkranz, Wendy Keung, Biman B. Mandal, Ronald A Li, Ting Zhang, HeaYeon Lee, Mehmet Remzi Dokmeci, Yu Shrike Zhang, Ali Khademhosseini\*, Su Ryon Shin\**

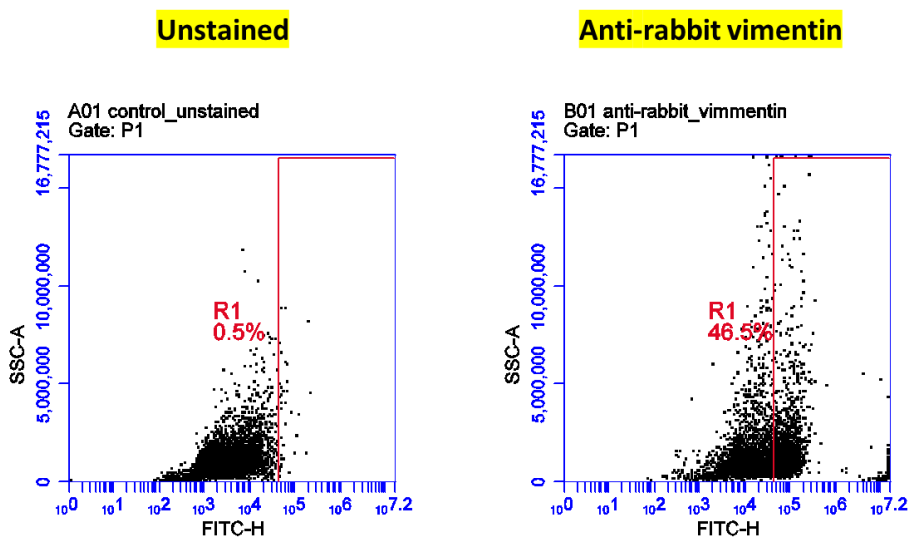

**Figure S1.** Flow cytometry characterization of Vimentin (cardiac fibroblast marker) in unstained and Vimentin-stained iPSC-derived cardiac cells.

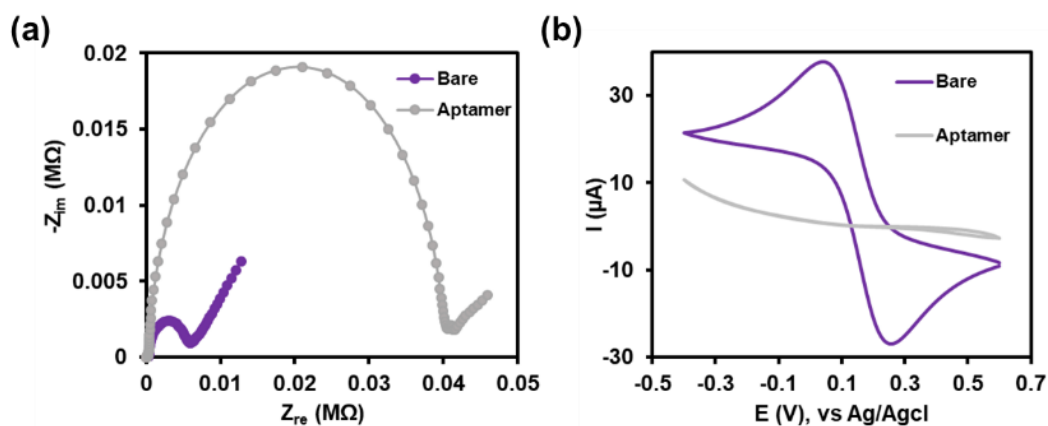

**Figure S2.** a) EIS plots of the bare and aptamer functionalized electrode and b) the corresponding CV plots for the EC characterization of electrode functionalization process.

| Cardiac biomarker | Biomarker | Clinical cut-off levels (ng/mL) | Range (g/mL) | R <sup>2</sup> | LOD       |
|-------------------|-----------|---------------------------------|--------------|----------------|-----------|
| Troponin T        | Aptamer   | 0.05 – 0.1                      | 0.1p - 1n    | 0.987          | ..        |
| CK-MB*            | Aptamer   | 0.6                             | 10p -100n    | 0.967          | 2.4 pg/mL |
| HER2              | Aptamer   | 8.1 - 75                        | 0.1p - 1n    | 0.988          | ..        |

\*Previously determined in Shin, et al., Anal. Chem., 2016

**Table S1.** Biomarkers for sensing platform. Calibration curves performed at 37 °C.

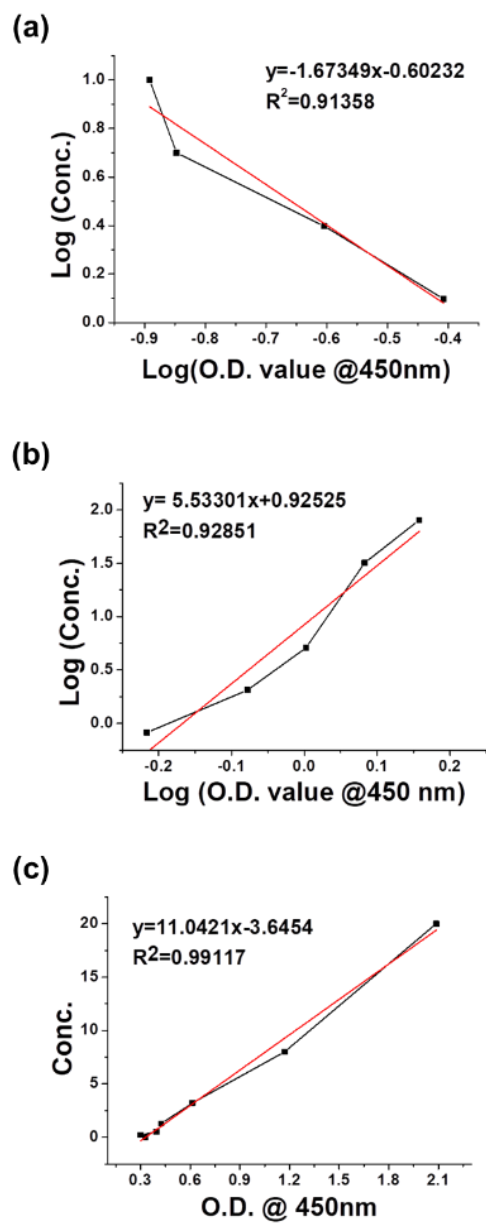

**Figure S3.** Calibration curves for a) Troponin T, b) CK-MB, and c) HER-2 biomarkers.

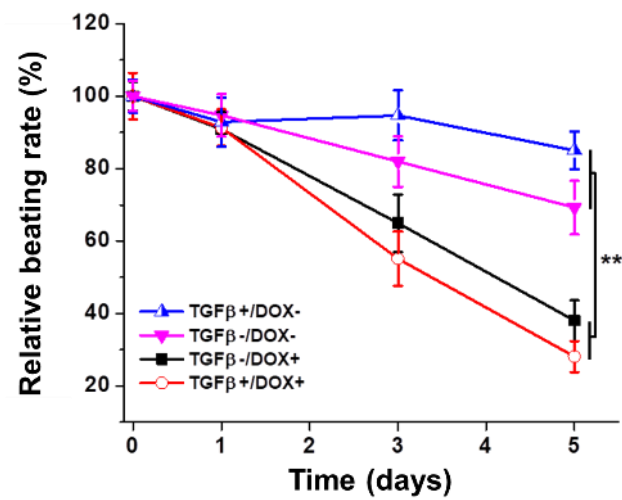

**Figure S4.** Relative beating frequency rate of healthy or fibrotic cardiac tissues cultured for 5 days with or without DOX (N=3). (One-way ANOVA with Tukey significant difference post hoc test; \*\*p<0.005). Error bars represent standard deviation.

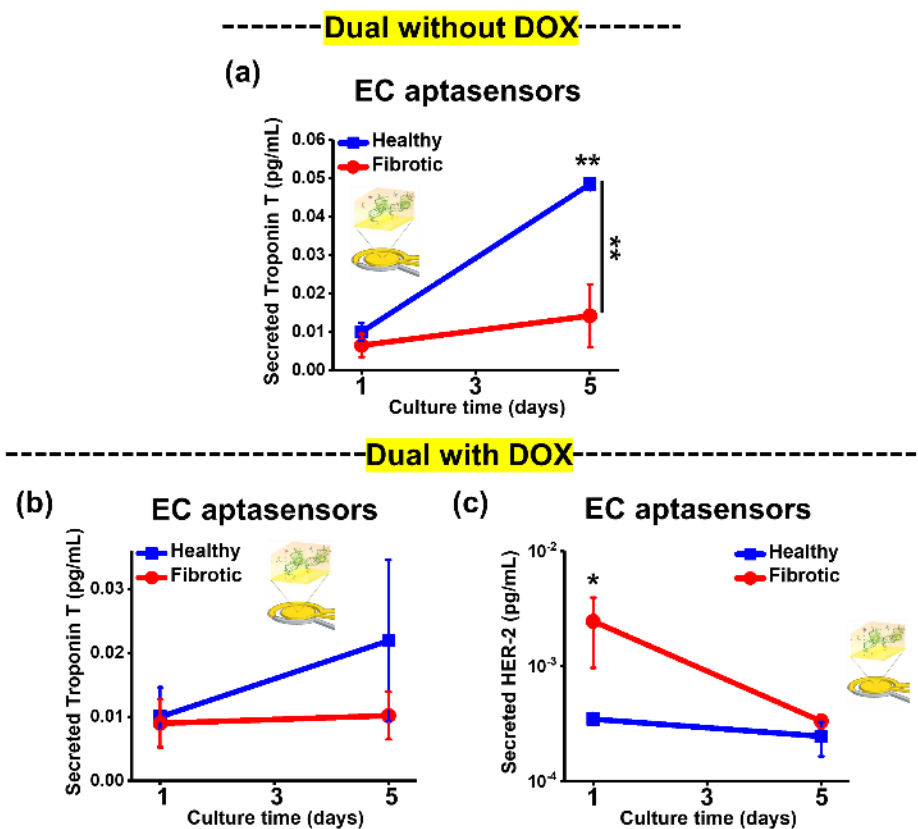

**Figure S5.** a) EC measurement of Troponin T production in healthy or fibrotic cardiac tissues on dual chips without DOX. EC measurement of b) Troponin T and c) HER-2 rate in healthy or fibrotic cardiac tissues on dual chips with the DOX treatment. (One-way ANOVA with Tukey significant difference post hoc test; \* $p < 0.05$  and \*\* $p < 0.005$ ). Error bars represent standard deviation.

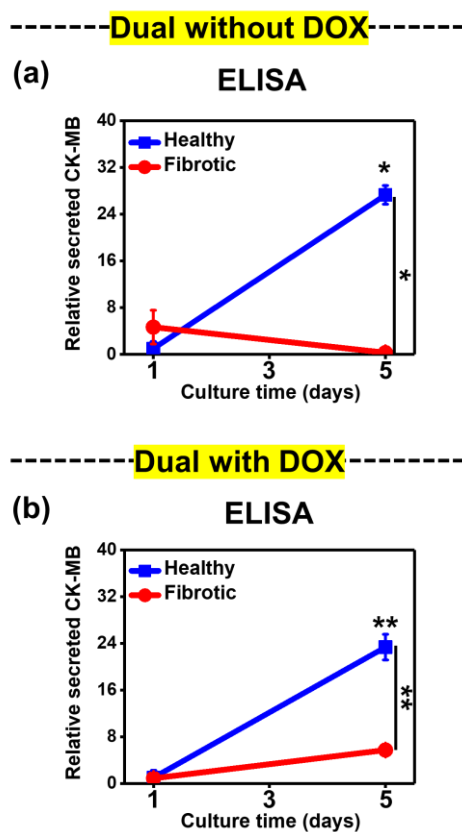

**Figure S6.** ELISA measurement of CK-MB productions in healthy or fibrotic cardiac tissues on dual chips a) with and b) without the DOX treatment. (One-way ANOVA with Tukey significant difference post hoc test; \* $p < 0.05$  and \*\* $p < 0.005$ ). Error bars represent standard deviation.

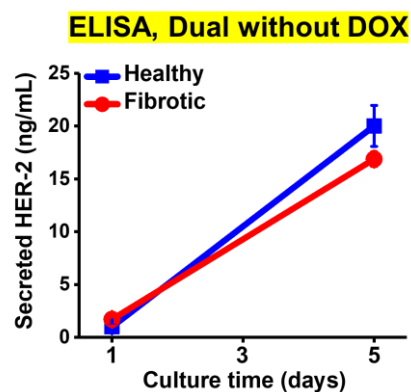

**Figure S7.** ELISA measurement of HER-2 production in healthy or fibrotic cardiac tissues on dual chips without DOX. Error bars represent standard deviation.

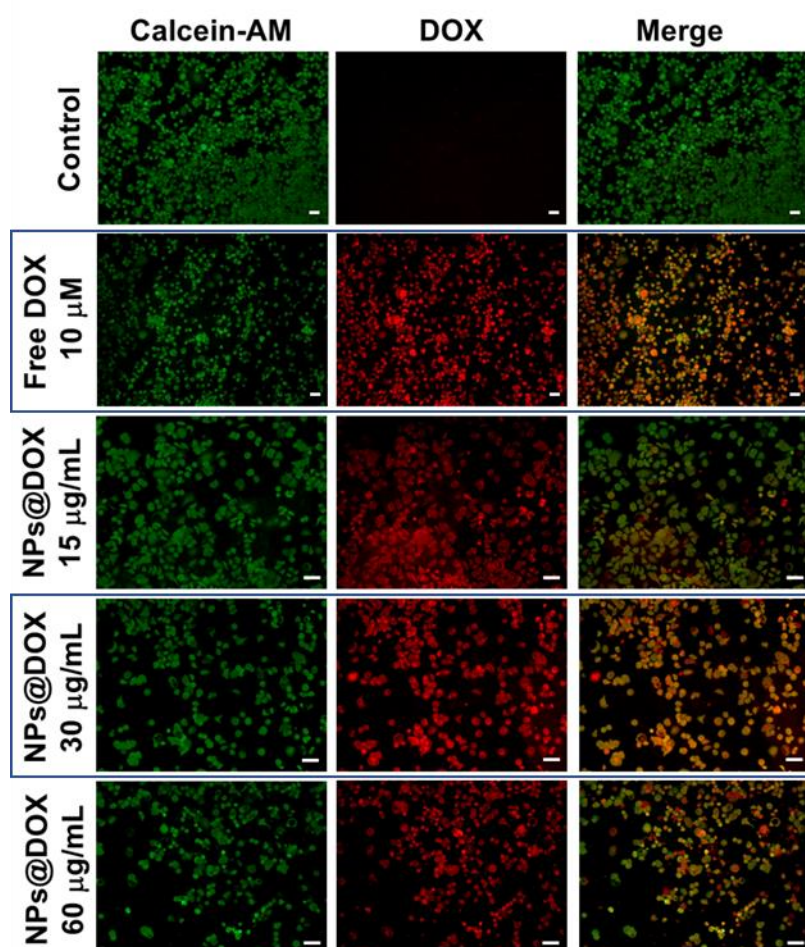

**Figure S8.** Representative immunofluorescence images of live/dead staining for breast cancer cells after 24 hours in culture with the addition of free DOX or NP-conjugated DOX for the determination of optimal concentration compared with the free DOX treatment (10  $\mu$ M). Scale bar: 50  $\mu$ m.

| Primer            | Forward                         | Reverse                            |
|-------------------|---------------------------------|------------------------------------|
| Troponin T (cTnT) | TTC ACC AAA GAT CTG CTC CTC GCT | TTA TTA CTG GTG TGG AGT GGG TGT GG |
| Cx43              | GGC TGC TCC TCA CCA ACG GCT     | AGG TCA TCA GGC CGA GGC CTG        |
| $\alpha$ -SMA     | ACT GCC TTG GTG TGT GAC AAT GG  | TGG TGC CAG ATC TTT TCC ATG        |
| Col1A1            | GGA CAC AGA GGT TTC AGT GGT     | CAC CAT CAT TTC CAC GAG CA         |
| GAPDH             | CAG AAC ATC ATC CCT GCC TCT AG  | TTG AAG TCA GAG GAG ACC ACC T      |

**Table S2.** Primer sequences used for gene expression analysis
